# Supplementary material
Source: ML conference proceedings conference paper supplement (https://proceedings.mlr.press/v97/ghadikolaei19a.html)
Supplement: Supplementary file 1 [file ghadikolaei19a-supp.pdf]

**Supplementary Material To ICML 2019 Submission**  
**Learning and Data Selection in Big Datasets**

**A. Proofs**

**A.1. Proposition 1**

Observe for  $z^{(k+1)}$  of (9) that  $g_2(z^{(k+1)}) = K$ , which satisfies the constraint of optimization problem (P2a). For index sequence  $j$ , introduced in Proposition 1, define  $c_{j_i}^{(k)} := \ell(x_{j_i}, f(x_{j_i}), h^{(k)}(x_{j_i}))$ . By definition,  $c_{j_1}^{(k)} < c_{j_2}^{(k)} < \dots < c_{j_N}^{(k)}$ . We use the following lemmas:

**Lemma 1.** For any  $m \leq K$ , the solution of (P2a) satisfies  $z_{j_m}^{(k+1)} = 1$ .

**Lemma 2.** For any  $m > K$ , the solution of (P2a) satisfies  $z_{j_m}^{(k+1)} = 0$ .

From Lemmas 1 and 2,  $\|z^{(k+1)}\|_0 = K$  and

$$z_i^{(k+1)} = \begin{cases} 1 & i = j_1, j_2, \dots, j_K \\ 0 & i = j_{K+1}, \dots, j_N, \end{cases}$$

which completes the proof.

**A.2. Proposition 2**

Note that the constraint on  $z$  must be closed and convex, as a sufficient condition for convergence of BCD. Clearly this is not the case with  $z \in \{0, 1\}^N$  in (Q1). Leveraging the equivalence between (P2) and its linear program relaxation, (P3), the constraint  $z \in [0, 1]^N$  is closed and convex. Since a unique minimizer is found at each update, convergence to a stationary point follows from the standard convergence results Bertsekas (1999)[Chap 2.7].

**A.3. Proposition 4**

We start by proving Proposition 4 for  $d = 1$ . To this end, we first introduce a variant of (P2) in which we define  $K$  equidistant marks in  $x \in \mathcal{X} = [0, T]$  and project  $\mathcal{E}^*$  to this set of marks, namely we replace every entry in  $\mathcal{E}^*$  by its closest mark (measured by the Euclidian distance). Moreover, we limit  $\mathcal{H}$  to the class of  $L$ -Lipschitz functions passing through those marks. We first observe that the approximation error of the solution of (P2) is upper bounded by that of the variant. In the following, we derive the bound of Proposition 4 using the variant problem.

Divide entire domain  $\mathcal{X}$  by  $K$  marks to some  $K - 1$  disjoint sets  $\{\mathcal{S}_i \mid \bigcup_{i \in [K-1]} \mathcal{S}_i = \mathcal{X}, \mathcal{S}_i \cap \mathcal{S}_j = \emptyset, \forall i, j \in [K-1]\}$ .

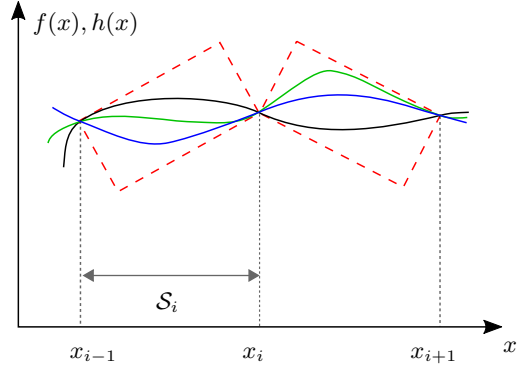

Figure A.1: Illustration of the functional class  $\mathcal{F}$ . Input space  $\mathcal{X}$  is divided into disjoint sets  $\{\mathcal{S}_i\}$ .  $\mathcal{F}$  is the set of all  $L$ -Lipschitz functions passing through samples/marks  $\{x_i\}_{i \in [K]}$ . All functions  $f, h \in \mathcal{F}$  lie in the dashed red parallelograms. The slopes of these parallelograms are  $\pm L$ . Three possible functions are shown in the figure.

Define without loss of generality  $\mathcal{S}_i = [x_{i-1}, x_i]$  for sorted  $x_i$ , and define  $x_0 := 0$  and  $x_{K-1} := T$ . Note that  $\mathcal{F}$  is the set of  $L$ -Lipschitz functions, samples are noiseless, and  $\{x_i\}$  are in the compressed dataset. Figure A.1 illustrates the function class  $\mathcal{F}$  and three potential examples for  $f(x)$  and  $h(x)$ .

Define  $\ell_x := \ell(x, f(x), h^*(x))$ . Let  $\mu_x$  be the probability measure on  $\mathcal{X}$  that generates input samples  $x$ . We have

$$\mathbb{E}_x \ell_x = \int_{\mathcal{X}} \ell_x d\mu_x = \sum_{i \in [K-1]} \int_{\mathcal{S}_i} \ell_{s_i} d\mu_{s_i}, \quad (\text{A.1})$$

where  $s_i \in \mathcal{S}_i$ ,  $\{\mu_{s_i}\}$  are sub-probability measures on sets  $\{\mathcal{S}_i\}$ , and  $\sum_{i \in [K-1]} \mu_{s_i} = 1$ . From the extreme value theorem, there exists  $\ell_{s_i}^{\max}$  for every interval  $\mathcal{S}_i$  such that  $\ell_{s_i} \leq \ell_{s_i}^{\max}, \forall s_i \in \mathcal{S}_i$ . Therefore,  $\mathbb{E}_x \ell_x \leq \max_i \ell_{s_i}^{\max}$ . Consider the following lemma:

**Lemma 3.** For our variant problem,  $|f(x) - h(x)| \leq 2L\|x\|$  for all  $x \in \mathcal{S}_i$  and all  $i$ , where  $\|x\|$  is the  $L^2$ -norm of vector  $x$ .

The proof of Lemma 3 is straightforward after noting that  $f(x) - h(x)$  is a  $2L$ -Lipschitz function.

Consider loss function  $\ell_x = |f(x) - h(x)|^2$ . When  $d = 1$ , it is easy to see from Lemma 3 and figure A.1 that  $\ell_{s_i}^{\max} \leq 4L^2(x_i - x_{i-1})^2$  for every set  $\mathcal{S}_i$ , where  $x_i - x_{i-1}$  is the measure of set  $\mathcal{S}_i$ . Now, since sets  $\{\mathcal{S}_i\}, i \in [K - 1]$  have

the same measure (defined based on equidistant grid points), we have  $x_i - x_{i-1} = T/(K-1)$ , so

$$\mathbb{E}_x \ell_x \leq \max_i \ell_{s_i}^{\max} \leq \frac{4L^2 T^2}{(K-1)^2}.$$

By setting  $g(h^*, z^*) \leq \mathbb{E}_x \ell_x \leq \delta$ , we get  $K \geq 1 + 2LT/\sqrt{\delta}$ .

For  $d > 1$ , we can define equidistant marks on every coordinate of  $\mathcal{X}$  and define a grid of  $(K^{1/d} - 1)^d$  disjoint sets  $\{S_i\}_i$ , where we have assumed that  $K^{1/d}$  is an integer number to avoid unnecessary notation complications. The distance between two consecutive marks on every coordinate is  $T/(K^{1/d} - 1)$ , and therefore from Lemma 3

$$\mathbb{E}_x \leq \max_i \ell_{s_i}^{\max} \leq \left( 2L \frac{T\sqrt{d}}{K^{1/d} - 1} \right)^2.$$

By setting  $g(h^*, z^*) \leq \mathbb{E}_x \ell_x \leq \delta$ , we get  $K \geq (1 + 2LT\sqrt{d/\delta})^d$ . This completes the proof.

#### A.4. Lemma 1

Assume  $\sum_{i \in [N]} z_i^{(k+1)} = \sum_{i \in [N]} z_{j_i}^{(k+1)} = M \geq K$ . For  $k = 1$ , if  $z_{j_1}^{(k+1)} = 1$  the statement holds. If  $z_{j_1}^{(k+1)} = 0$ , then take any  $n$  for which  $z_{j_n}^{(k+1)} = 1$  and observe that the following inequality holds by definition of index set  $j$ :

$$\begin{aligned} \frac{\sum_{i \in [N]} z_{j_i}^{(k+1)} c_{j_i}^{(k)}}{M} &= \frac{\sum_{i \in [N] \setminus \{n\}} z_{j_i}^{(k+1)} c_{j_i}^{(k)} + c_{j_n}^{(k)}}{M} \\ &\geq \frac{\sum_{i \in [N] \setminus \{n\}} z_{j_i}^{(k+1)} c_{j_i}^{(k)} + c_{j_1}^{(k)}}{M}, \end{aligned}$$

since  $c_{j_1}^{(k)} < c_{j_n}^{(k)}$  for any  $n$ . This completes the proof for  $k = 1$ . For  $k = 2 \leq K$ , if  $z_{j_2}^{(k+1)} = 1$  the statement holds. If  $z_{j_2}^{(k+1)} = 0$ , then take any  $n \geq 3$  for which  $z_{j_n}^{(k+1)} = 1$ . Use  $z_{j_1}^{(k+1)} = 1$  and observe that

$$\begin{aligned} \frac{\sum_{i \in [N]} z_{j_i}^{(k+1)} c_{j_i}^{(k)}}{M} &= \frac{c_{j_1}^{(k)} + c_{j_n}^{(k)} + \sum_{i \in [N] \setminus \{1, n\}} z_{j_i}^{(k+1)} c_{j_i}^{(k)}}{M} \\ &\geq \frac{c_{j_1}^{(k)} + c_{j_2}^{(k)} + \sum_{i \in [N] \setminus \{1, n\}} z_{j_i}^{(k+1)} c_{j_i}^{(k)}}{M} \end{aligned}$$

since  $c_{j_2}^{(k)} < c_{j_n}^{(k)}$  for any  $n > 2$ . We can use the same arguments recursively to prove that  $z_{j_m}^{(k+1)} = 1$  for any  $m \leq K$ .

#### A.5. Lemma 2

Assume  $\sum_{i \in [N]} z_{j_i}^{(k+1)} = M \geq K$ . By Lemma 1,  $z_{j_i}^{(k+1)} = 1$  for all  $i \leq K$ . We should show that

$$\frac{\sum_{i \in [K]} c_{j_i}^{(k)}}{K} \leq \frac{\sum_{i \in [K]} c_{j_i}^{(k)} + \sum_{i=K+1}^N z_{j_i}^{(k+1)} c_{j_i}^{(k)}}{M}$$

for any  $z_{j_i}^{(k+1)}$ . This is clearly true as the left-hand-side is the average of the  $K$  smallest values of the loss function on dataset of size  $N$ . In particular,

$$\begin{aligned} &\frac{\sum_{i \in [K]} c_{j_i}^{(k)} + \sum_{i=K+1}^N z_{j_i}^{(k+1)} c_{j_i}^{(k)}}{M} \\ &\geq \frac{\sum_{i \in [K]} c_{j_i}^{(k)} + \overbrace{c_{j_K}^{(k)} + c_{j_K}^{(k)} + \dots + c_{j_K}^{(k)}}^{M-K}}{M} \\ &= \frac{\sum_{i \in [K]} c_{j_i}^{(k)}}{K} \\ &\quad + \frac{\overbrace{(M-K)Kc_{j_K}^{(k)} - (M-K)\sum_{i \in [K]} c_{j_i}^{(k)}}^{\geq 0}}{MK} \\ &\stackrel{(a)}{\geq} \frac{\sum_{i \in [K]} c_{j_i}^{(k)}}{K}, \end{aligned}$$

where (a) holds as  $Kc_{j_K}^{(k)} \geq \sum_{i \in [K]} c_{j_i}^{(k)}$ . This completes the proof.

#### A.6. Optimality of (8)

To prove the optimality of (8), recall that  $\mathbf{1}^T z = K$  in (P2a) is of the form  $\mathbf{A}z = B$ , where  $\mathbf{A}$  is a totally unimodular matrix, and  $B$  is an integer. Thus, optimization problem(8) is equivalent to (P2a), and the linear program relaxation is optimal.

## B. Additional Examples

The following example shows the generality of Assumptions 1 and 2.

**Example 4.** Let  $\mathcal{P}$  denote the space of polynomial functions on  $\mathbb{R}$ ,  $f(x) = e^x (\in \mathcal{P})$ ,  $h(x) = \sum_{n=0}^{N-1} x^n/n!$  ( $\in \mathcal{P}$ ) be the first  $N (< \infty)$  terms of the Taylor expansion of  $f(x)$ , and  $\ell_n(h) := |f(x_n) - h(x_n)|^2$ .  $\ell_n(h)$  is compatible with Assumption 1. Moreover, for almost any  $x_n, x_m \in \mathbb{R}$  (except a set of Lebesgue measure 0) such that  $x_n \neq x_m$ , we have  $\ell_n(h) \neq \ell_m(h)$ , so Assumption 2 holds.

This example be easily generalized to the class of problems we study in this paper.

**References**

110  
111  
112  
113  
114  
115  
116  
117  
118  
119  
120  
121  
122  
123  
124  
125  
126  
127  
128  
129  
130  
131  
132  
133  
134  
135  
136  
137  
138  
139  
140  
141  
142  
143  
144  
145  
146  
147  
148  
149  
150  
151  
152  
153  
154  
155  
156  
157  
158  
159  
160  
161  
162  
163  
164

D.P. Bertsekas. *Nonlinear Programming*. Athena Scientific,  
2 edition, 1999.
